# Supplementary material for: Brain Activation for Social Cognition and Emotion Processing Tasks in Borderline Personality Disorder: A Meta-Analysis of Neuroimaging Studies
Source: MDPI journal article supplement (doi:10.3390/brainsci14040395), 2024-04-18
Supplement: s1 [file s1]

# Supplementary Table S1

Characteristics of included studies: Number of participants, mean age, sex ratio, medication status, description of tasks and stimuli.

| Study                                                        | BPD |       |           |          | Controls |       |           | Task                                                  | Contrast                                           |                |
|--------------------------------------------------------------|-----|-------|-----------|----------|----------|-------|-----------|-------------------------------------------------------|----------------------------------------------------|----------------|
|                                                              | N   | Age   | N<br>male | N<br>med | N        | Age   | N<br>male |                                                       |                                                    |                |
| Narrow tasks selection (n=19)                                |     |       |           |          |          |       |           |                                                       |                                                    | Abstract Stim. |
| Beeney 2016                                                  | 17  | 35.51 | 0         | 10       | 21       | 33.33 | 0         | Judging personality traits for self and other         | Avg. activation for all judgments*                 | +              |
| Bertsch 2022                                                 | 48  | 29.6  | 0         | 0        | 28       | 27.8  | 0         | Social Threat Aggression Paradigm                     | Aggressive cues > neutral cues in interaction      |                |
| Cullen 2016                                                  | 12  | 25.2  | 0         | 1        | 12       | 24.2  | 0         | Viewing faces, covert presentation, implicit task     | Covert fear > neutral faces                        |                |
| Doell 2020                                                   | 21  | 27.43 | 0         | 13+      | 24       | 24.71 | 0         | Monetary and social reward feedback task              | Social feedback > non-social feedback              |                |
| Domsalla 2014                                                | 20  | 29.20 | 0         | 0        | 20       | 28.70 | 0         | Virtuall ball tossing game (cyberball)                | Exclusion > Obligatory inclusion                   |                |
| Fertuck 2019                                                 | 16  | 25.94 | 0         | 0        | 17       | 23.71 | 0         | Rating faces regarding trustworthiness or fear        | Trustworthy-to-untrustw. > fearful-to-neutral      |                |
| Fertuck 2023                                                 | 23  | 26.26 | 0         | 0        | 22       | 25.95 | 0         | Virtuall ball tossing game (cyberball)                | High > low rejection distress during exclusion     |                |
| Frick 2012                                                   | 21  | 27.14 | 0         | 0        | 20       | 24.80 | 0         | Reading Mind in the Eyes (RMET) task                  | Neg. > neutral emotion (affective mentalizing)     |                |
| Goettlich 2020                                               | 19  | 26.50 | 0         | 9+       | 22       | 26.40 | 0         | Read scenarios and imagine being part                 | Guilt scenarios (social content) > neutral         | +              |
| Guitart-M. 2009                                              | 10  | 31.3  | 5         | 0        | 10       | 31.2  | 5         | Discrimination of face emotions / figure orientations | Fearful faces > neutral figures                    |                |
| Herpertz 2017                                                | 33  | 26.19 | 0         | 0        | 30       | 27.69 | 0         | Listen to script, imagine the scene                   | Avg. activation for interpersonal rejection phase* | +              |
| Lamers 2019                                                  | 20  | 25.95 | 0         | 0        | 20       | 26.90 | 0         | Viewing movie sequences showing faces                 | Negative > neutral faces                           |                |
| Mier 2013                                                    | 13  | 28.15 | 4         | 12       | 13       | 30.46 | 5         | Judge intentions from emotional faces                 | Avg. activation for all judgments*                 |                |
| Nicol 2015                                                   | 20  | 35.6  | 3         | 15+      | 16       | 35.7  | 2         | View faces and judge gender                           | Negative > neutral faces                           |                |
| Olie 2018                                                    | 20  | 26.95 | 0         | 12+      | 23       | 25.00 | 0         | Virtuall ball tossing game (cyberball)                | Exclusion > inclusion                              |                |
| Peters 2018                                                  | 13  | 21.81 | 0         | 2        | 16       | 21.23 | 0         | Directed Rumination Task                              | Content is previous provocation > is neutral       | +              |
| van Schie 2020                                               | 26  | 30.46 | 0         | 3        | 32       | 28.12 | 0         | Receiving feedback about an interview                 | Negative (e.g. "arrogant") > positive feedback     | +              |
| Wrege 2019                                                   | 39  | 27.50 | 9         | 23       | 29       | 25.70 | 4         | Virtuall ball tossing game (cyberball)                | Exclusion > inclusion                              |                |
| Wrege 2021                                                   | 39  | 28.4  | 10        | 24       | 25       | 25.8  | 4         | View faces and judge gender                           | Negative > neutral faces                           |                |
| Additional tasks for extended task selection (combined n=29) |     |       |           |          |          |       |           |                                                       |                                                    |                |
| Hazlett 2012                                                 | 33  | 31.6  | 0         | 0        | 32       | 32.8  | 0         | Judging valence of IAPS pictures, repeat. present.    | Repeated unpleasant pictures*                      |                |
| Herpertz 2001                                                | 6   | 26.2  | 0         | 0        | 6        | 27.2  | 0         | Passive viewing IAPS pictures                         | Negative > neutral IAPS pictures                   |                |
| Koenigsb. 2009a                                              | 18  | 32.6  | 8         | 0        | 16       | 31.8  | 7         | Viewing IAPS pictures, rating own emotional react.    | Negative > neutral IAPS pictures                   |                |
| Koenigsb. 2009b                                              | 19  | 34.9  | 12        | 0        | 17       | 31.2  | 9         | Passive viewing IAPS pictures                         | Negative IAPS > resting baseline*                  |                |

|                  |    |      |   |    |    |      |    |                                                   |                                                    |
|------------------|----|------|---|----|----|------|----|---------------------------------------------------|----------------------------------------------------|
| Koenigsberg 2014 | 19 | 31.9 | 8 | 0  | 25 | 28.1 | 12 | Viewing pictures from IAPS and Empathy Pict. Sys. | Avg. activation negative pict. (novel + repeated)* |
| Niedtfeld 2010   | 20 | 30.5 | 0 | 0  | 23 | 27.1 | 0  | Passive viewing IAPS pictures                     | Avg. activation for negative pictures*             |
| Scherpiet 2014   | 18 | 28.4 | 0 | 11 | 18 | 28.9 | 0  | Passive viewing IAPS pictures                     | Negative > neutral IAPS pictures                   |
| Schnell 2007a    | 14 | 28.0 | 0 | 0  | 14 | 28.4 | 0  | Passive viewing IAPS pictures                     | Avg. activation for negative pictures*             |
| Schulze 2011     | 15 | 27.6 | 0 | 0  | 15 | 24.5 | 0  | Passive viewing IAPS pictures                     | Negative > neutral IAPS pictures                   |
| van Zutphen 2018 | 55 | 30.8 | 0 | 38 | 42 | 28.3 | 0  | Passive viewing IAPS pictures                     | Negative > neutral IAPS pictures                   |

---

N med ... reports the number of patients who were medicated at the time of the scan; n+ indicates multiple medications involving at least n patients.\* ... marks studies which did not employ a high-level control condition. + ... marks abstract (i.e., purely verbal) tasks, all other tasks showed concrete social stimuli (i.e., pictures or drawings of faces, persons, or interactions).
