# Supplementary material for: Brain Activation for Social Cognition and Emotion Processing Tasks in Borderline Personality Disorder: A Meta-Analysis of Neuroimaging Studies
Source: MDPI journal article supplement (doi:10.3390/brainsci14040395), 2024-04-18
Supplement: s1 [file s1]

Supplementary Table S2. Heterogeneity statistics  $I^2$ , and results of Egger's tests for cluster peaks from narrow and extended task selection meta-analyses.

| Label                                                         | mni |     |     | I <sup>2</sup> | Egger's test |       |    |       |
|---------------------------------------------------------------|-----|-----|-----|----------------|--------------|-------|----|-------|
|                                                               | x   | y   | z   |                | Bias         | z     | df | p     |
| <i>Narrow task selection</i>                                  |     |     |     |                |              |       |    |       |
| Borderline personality disorder > healthy controls            |     |     |     |                |              |       |    |       |
| R ant. cing. g.                                               | 8   | 38  | 0   | 14.399345      | 0.05         | 0.03  | 17 | 0.975 |
| L sup. front. g.                                              | -8  | 58  | 10  | 4.218039       | 0.03         | 0.02  | 17 | 0.983 |
| L ant. cing. g.                                               | -12 | 46  | 8   | 5.880384       | 0.02         | 0.01  | 17 | 0.99  |
| <i>Extended task selection (only clusters &gt; 20 voxels)</i> |     |     |     |                |              |       |    |       |
| Borderline personality disorder > healthy controls            |     |     |     |                |              |       |    |       |
| R parahipp. g.                                                | 22  | 0   | -26 | 8.253916       | -0.01        | -0.01 | 27 | 0.994 |
| R ant. cing. g.                                               | 12  | 44  | 4   | 11.747099      | 0            | 0     | 27 | 1     |
| R sup. temp. g.                                               | 64  | -32 | 12  | 0.834312       | 0.01         | 0.01  | 27 | 0.988 |
| L sup. front. g.                                              | -8  | 60  | 12  | 1.860792       | -0.01        | -0.01 | 27 | 0.995 |
| R med. cing. g.                                               | 8   | -16 | 50  | 12.574807      | 0.01         | 0.01  | 27 | 0.991 |
| Healthy controls > borderline personality disorder            |     |     |     |                |              |       |    |       |
| R inf. front. g.                                              | 46  | 18  | 2   | 9.62053        | 0.02         | 0.02  | 27 | 0.985 |
| L inf. front. g.                                              | -48 | 20  | 4   | 3.499163       | -0.01        | -0.01 | 27 | 0.992 |
